# Supplementary material for: The potential impact of advanced footwear technology on the recent evolution of elite sprint performances
Source: PeerJ journal article supplement (doi:10.7717/peerj.16433), 2023-11-27
Supplement: FileS3.pdf [file FileS3.pdf]

**Supplementary File 3:** P-values of the Wilcoxon-Mann-Whitney tests assessing the null hypothesis that it is equally likely that a value chosen at random from one year is greater or less than a value chosen at random from another year's population.

## Top 100

Table 1 Men's 100m

|      | 2016 | 2017     | 2018    | 2019     | 2021     |
|------|------|----------|---------|----------|----------|
| 2017 | 1    |          |         |          |          |
| 2018 | 1    | 0.638283 |         |          |          |
| 2019 | 1    | 1        | 1       |          |          |
| 2021 | 1    | 0.309905 | 1       | 1        |          |
| 2022 | 1    | 0.00015  | 0.00196 | 0.003115 | 0.062573 |

Table 2 Men's 110m hurdles

|      | 2016     | 2017     | 2018     | 2019     | 2021     |
|------|----------|----------|----------|----------|----------|
| 2017 | 1        |          |          |          |          |
| 2018 | 1        | 1        |          |          |          |
| 2019 | 1        | 1        | 0,714507 |          |          |
| 2021 | 0,097206 | 0,025    | 0,000356 | 0,003474 |          |
| 2022 | 0,003464 | 0,000552 | 4,56E-06 | 3,78E-05 | 0,726513 |

Table 3 Men's 200m

|      | 2016     | 2017     | 2018     | 2019     | 2021     |
|------|----------|----------|----------|----------|----------|
| 2017 | 1        |          |          |          |          |
| 2018 | 1        | 1        |          |          |          |
| 2019 | 1        | 1        | 1        |          |          |
| 2021 | 1        | 1        | 1        | 1        |          |
| 2022 | 0,052459 | 0,001119 | 0,046565 | 0,014442 | 0,047502 |

Table 4 Men's 400m

|      | 2016     | 2017     | 2018 | 2019     | 2021     |
|------|----------|----------|------|----------|----------|
| 2017 | 1        |          |      |          |          |
| 2018 | 0,572175 | 1        |      |          |          |
| 2019 | 1        | 1        | 1    |          |          |
| 2021 | 1        | 1        | 1    | 1        |          |
| 2022 | 0,052919 | 0,627806 | 1    | 0,078112 | 0,272402 |

Table 5 Men's 400m hurdles

|      | 2016     | 2017 | 2018 | 2019     | 2021     |
|------|----------|------|------|----------|----------|
| 2017 | 1        |      |      |          |          |
| 2018 | 1        | 1    |      |          |          |
| 2019 | 1        | 1    | 1    |          |          |
| 2021 | 1        | 1    | 1    | 1        |          |
| 2022 | 0,972897 | 1    | 1    | 0,388271 | 0,973264 |

Table 6 Women's 100m

|      | 2016     | 2017     | 2018     | 2019     | 2021     |
|------|----------|----------|----------|----------|----------|
| 2017 | 1        |          |          |          |          |
| 2018 | 1        | 0,466331 |          |          |          |
| 2019 | 1        | 1        | 1        |          |          |
| 2021 | 0,03227  | 0,02574  | 0,139897 | 0,011156 |          |
| 2022 | 4,53E-07 | 4,06E-06 | 2,3E-06  | 4,28E-08 | 0,003582 |

Table 7 Women's 100m hurdles

|      | 2016     | 2017     | 2018     | 2019     | 2021 |
|------|----------|----------|----------|----------|------|
| 2017 | 1        |          |          |          |      |
| 2018 | 1        | 1        |          |          |      |
| 2019 | 1        | 1        | 1        |          |      |
| 2021 | 1        | 0,004164 | 0,065499 | 0,129516 |      |
| 2022 | 0,746016 | 0,001377 | 0,023704 | 0,042453 | 1    |

Table 8 Women's 200m

|      | 2016     | 2017     | 2018     | 2019     | 2021     |
|------|----------|----------|----------|----------|----------|
| 2017 | 1        |          |          |          |          |
| 2018 | 1        | 0,492091 |          |          |          |
| 2019 | 1        | 1        | 1        |          |          |
| 2021 | 1        | 0,265376 | 1        | 0,002601 |          |
| 2022 | 0,085241 | 0,000304 | 0,043264 | 2,27E-06 | 0,265376 |

Table 9 Women's 400m

|      | 2016     | 2017     | 2018     | 2019     | 2021 |
|------|----------|----------|----------|----------|------|
| 2017 | 1        |          |          |          |      |
| 2018 | 0,804407 | 0,371019 |          |          |      |
| 2019 | 1        | 0,702147 | 1        |          |      |
| 2021 | 1,35E-05 | 2,2E-07  | 0,001172 | 6,98E-05 |      |
| 2022 | 4,93E-05 | 5,75E-07 | 0,002364 | 0,000161 | 1    |

Table 10 Women's 400m hurdles

|      | 2016 | 2017     | 2018     | 2019     | 2021 |
|------|------|----------|----------|----------|------|
| 2017 | 1    |          |          |          |      |
| 2018 | 1    | 1        |          |          |      |
| 2019 | 1    | 1        | 1        |          |      |
| 2021 | 1    | 1        | 0,346209 | 0,375669 |      |
| 2022 | 1    | 0,608207 | 0,098102 | 0,080571 | 1    |

## Top 20

Table 11 Men's 100m

|      | 2016     | 2017     | 2018     | 2019     | 2021 |
|------|----------|----------|----------|----------|------|
| 2017 | 1        |          |          |          |      |
| 2018 | 1        | 0,800315 |          |          |      |
| 2019 | 1        | 1        | 1        |          |      |
| 2021 | 0,972321 | 0,017573 | 0,297023 | 0,059996 |      |
| 2022 | 1        | 0,021544 | 0,33573  | 0,078011 | 1    |

Table 112 Men's 110m hurdles

|      | 2016     | 2017     | 2018     | 2019     | 2021 |
|------|----------|----------|----------|----------|------|
| 2017 | 1        |          |          |          |      |
| 2018 | 1        | 1        |          |          |      |
| 2019 | 1        | 1        | 1        |          |      |
| 2021 | 0,303898 | 0,57473  | 0,003671 | 0,082601 |      |
| 2022 | 0,109341 | 0,290332 | 0,003215 | 0,062877 | 1    |

Table 13 Men's 200m

|      | 2016     | 2017     | 2018     | 2019     | 2021     |
|------|----------|----------|----------|----------|----------|
| 2017 | 1        |          |          |          |          |
| 2018 | 1        | 0,062617 |          |          |          |
| 2019 | 1        | 0,175687 | 1        |          |          |
| 2021 | 1        | 0,685787 | 1        | 1        |          |
| 2022 | 0,175687 | 0,000813 | 0,232567 | 0,269417 | 0,154942 |

Table 14 Men's 400m

|      | 2016 | 2017 | 2018 | 2019 | 2021 |
|------|------|------|------|------|------|
| 2017 | 1    |      |      |      |      |
| 2018 | 1    | 1    |      |      |      |
| 2019 | 1    | 1    | 1    |      |      |
| 2021 | 1    | 1    | 1    | 1    |      |
| 2022 | 1    | 1    | 1    | 1    | 1    |

Table 15 Men's 400m hurdles

|      | 2016     | 2017     | 2018     | 2019     | 2021 |
|------|----------|----------|----------|----------|------|
| 2017 | 1        |          |          |          |      |
| 2018 | 1        | 1        |          |          |      |
| 2019 | 1        | 1        | 1        |          |      |
| 2021 | 0,407642 | 0,524398 | 0,53255  | 0,160764 |      |
| 2022 | 0,197812 | 0,338821 | 0,407642 | 0,160764 | 1    |

Table 16 Women's 100m

|      | 2016     | 2017     | 2018     | 2019     | 2021     |
|------|----------|----------|----------|----------|----------|
| 2017 | 1        |          |          |          |          |
| 2018 | 1        | 1        |          |          |          |
| 2019 | 1        | 1        | 1        |          |          |
| 2021 | 1        | 0,517847 | 0,006641 | 0,012547 |          |
| 2022 | 0,317904 | 0,018162 | 4,46E-05 | 0,004229 | 0,494987 |

Table 17 Women's 100m hurdles

|      | 2016     | 2017     | 2018     | 2019     | 2021     |
|------|----------|----------|----------|----------|----------|
| 2017 | 0,711735 |          |          |          |          |
| 2018 | 1        | 1        |          |          |          |
| 2019 | 0,711735 | 1        | 0,699526 |          |          |
| 2021 | 0,045484 | 0,231794 | 0,114568 | 0,614191 |          |
| 2022 | 0,001485 | 0,001485 | 0,005646 | 0,014589 | 0,076741 |

Table 18 Women's 200m

|      | 2016     | 2017     | 2018     | 2019     | 2021 |
|------|----------|----------|----------|----------|------|
| 2017 | 1        |          |          |          |      |
| 2018 | 1        | 1        |          |          |      |
| 2019 | 1        | 1        | 1        |          |      |
| 2021 | 0,012536 | 0,016489 | 0,003203 | 0,007309 |      |
| 2022 | 0,007309 | 0,007309 | 0,001137 | 0,005665 | 1    |

Table 19 Women's 400m

|      | 2016     | 2017     | 2018     | 2019     | 2021 |
|------|----------|----------|----------|----------|------|
| 2017 | 1        |          |          |          |      |
| 2018 | 1        | 1        |          |          |      |
| 2019 | 1        | 1        | 1        |          |      |
| 2021 | 0,026829 | 0,011861 | 0,054195 | 0,010109 |      |
| 2022 | 0,467379 | 0,615339 | 0,757428 | 0,054195 | 1    |

Table 20 Women's 400m hurdles

|      | 2016     | 2017     | 2018     | 2019     | 2021 |
|------|----------|----------|----------|----------|------|
| 2017 | 1        |          |          |          |      |
| 2018 | 1        | 1        |          |          |      |
| 2019 | 1        | 1        | 1        |          |      |
| 2021 | 1        | 1        | 0,074017 | 0,574967 |      |
| 2022 | 0,103321 | 0,574967 | 0,005963 | 0,074017 | 1    |
